# Supplementary material for: The supramolecular self-assembly of 5-fluorouracil and caffeic acid through cocrystallization strategy opens up a new way for the development of synergistic antitumor pharmaceutical cocrystal
Source: Royal Society of Chemistry journal article supplement (doi:10.1039/d0ce01297a), 2020-01-01
Supplement: d0ce01297a1.pdf [file d0ce01297a1.pdf]

## Supplementary Information

### **The supramolecular self-assembly of 5-fluorouracil and caffeic acid through cocrystallization strategy opens up a new way for the development of synergistic antitumor pharmaceutical cocrystal†**

Yue-Ming Yu,<sup>‡a</sup> Ling-Yang Wang,<sup>‡a</sup> Fan-Zhi Bu,<sup>a</sup> Lin-Lin Wang,<sup>a</sup> Yan-Tuan Li,<sup>a,b,\*</sup> Cheng Wang<sup>a,\*</sup> and Zhi-Yong Wu<sup>a,\*</sup>

<sup>a</sup>*School of Medicine and Pharmacy, Ocean University of China, Qingdao, Shandong 266003, PR China.*

<sup>b</sup>*Laboratory for Marine Drugs and Bioproducts, Qingdao National Laboratory for Marine Science and Technology, 266003, PR China.*

\* Correspondence to: Yan-Tuan Li, Cheng Wang, and Zhi-Yong Wu.

E-mail addresses: yantuanli@ouc.edu.cn (Yan-Tuan Li), Cheng Wang@ouc.edu.cn (Cheng Wang) and wuzy@ouc.edu.cn (Zhi-Yong Wu)

‡ These authors contributed equally to this work.

---

\*Correspondence to: Yan-Tuan Li, Cheng Wang and Zhi-Yong Wu.

E-mail address: yantuanli@ouc.edu.cn (Yan-Tuan Li), Cheng Wang@ouc.edu.cn (Cheng Wang) and wuzy@ouc.edu.cn (Zhi-Yong Wu).

‡ These authors contributed equally to this work.

---

## Contents

**Table S1** HPLC parameters for FL

**Table S2** Screenings for the cocrystal of FL with phenolic acid of hydroxy-cinnamic acid group.

**Table S3** The MEP values around relevant atoms in FL and the cocrystal.

**Fig. S1** FT-IR spectra of FL-CF-2H<sub>2</sub>O cocrystal compared with the starting materials.

**Fig. S2** DSC (blue line) and TGA (red line) profiles of pure FL (a) and CF (b).

**Fig. S3** PXRD comparison of simulated pattern and experimental patterns for remaining solids after the powder dissolution measurements.

**Fig. S4** IDR profiles of FL, PM and FL-CF-2H<sub>2</sub>O cocrystal at pH 1.2, 4.0, and 6.8 buffers.

**Table S1** HPLC parameters for FL

| Parameter          | Details                                  |
|--------------------|------------------------------------------|
| Column             | Diamonsil C-18 column (4.6×250 mm, 5 μm) |
| Mobile phase       | methanol-water (5:95)                    |
| Flow rate          | 1.0 mL·min <sup>-1</sup>                 |
| Column temperature | 25 °C                                    |
| λ <sub>max</sub>   | 265 nm                                   |
| Retention time     | 6 min                                    |
| Calibration range  | 50~2000 ng·mL <sup>-1</sup>              |

**Table S2** Screenings for the cocrystal of FL with phenolic acid of hydroxy-cinnamic acid group

| sample number | system             | molar ratio | cocrystal formation |
|---------------|--------------------|-------------|---------------------|
| 1             | FL-caffeic acid    | 1:1         | Yes                 |
| 2             | FL-caffeic acid    | 1:2         | No                  |
| 3             | FL-caffeic acid    | 2:1         | No                  |
| 4             | FL-ferulic acid    | 1:1         | No                  |
| 5             | FL-ferulic acid    | 1:2         | No                  |
| 6             | FL-ferulic acid    | 2:1         | No                  |
| 7             | FL-p-coumaric acid | 1:1         | No                  |
| 8             | FL-p-coumaric acid | 1:2         | No                  |
| 9             | FL-p-coumaric acid | 2:1         | No                  |
| 10            | FL-sinapic acid    | 1:1         | No                  |
| 11            | FL-sinapic acid    | 1:2         | No                  |
| 12            | FL-sinapic acid    | 2:1         | No                  |

**Table S3** The MEP values of maxima and minima around relevant atoms in FL and cocrystal

|     | FL dimer in free FL | FL hydrated tetramer in the cocrystal | FL-CF heterodimer in the cocrystal | FL-CF hydrated tetramer in the cocrystal | FL-CF hydrated trimer in the cocrystal | CF hydrated tetramer in the cocrystal |
|-----|---------------------|---------------------------------------|------------------------------------|------------------------------------------|----------------------------------------|---------------------------------------|
| F1  | -31.83, -31.23      |                                       |                                    |                                          | -8.73                                  |                                       |
| O1  | -12.27, -12.24      |                                       | -26.05                             |                                          |                                        |                                       |
| O2  | -37.39, -37.40      | -57.49, -56.86                        |                                    | -40.74                                   | -33.27                                 |                                       |
| O4  |                     |                                       | -23.08                             |                                          |                                        |                                       |
| O5  |                     |                                       |                                    | -32.51                                   |                                        | -24.92, -24.94                        |
| O7  |                     |                                       |                                    | -49.93                                   |                                        | -26.07, -26.06                        |
| O8  |                     |                                       |                                    | -40.74                                   | -36.47                                 |                                       |
| H1  | 43.17, 43.19        |                                       |                                    | 18.39                                    |                                        |                                       |
| H2A | 40.60, 40.56        |                                       | 35.35                              |                                          |                                        |                                       |
| H3  |                     |                                       | 7.43                               |                                          |                                        |                                       |
| H5  |                     |                                       |                                    | 20.41                                    | -33.47                                 |                                       |
| H6A |                     |                                       |                                    |                                          |                                        | 13.67, 13.68                          |
| H7A |                     |                                       |                                    | 15.85                                    |                                        | 30.82, 31.69                          |
| H8A |                     | 12.30, 12.33                          |                                    | 36.70                                    | 18.87                                  |                                       |
| H8B |                     | 2.63, 2.64                            |                                    |                                          |                                        |                                       |
| H9  |                     |                                       |                                    |                                          | 11.07                                  |                                       |

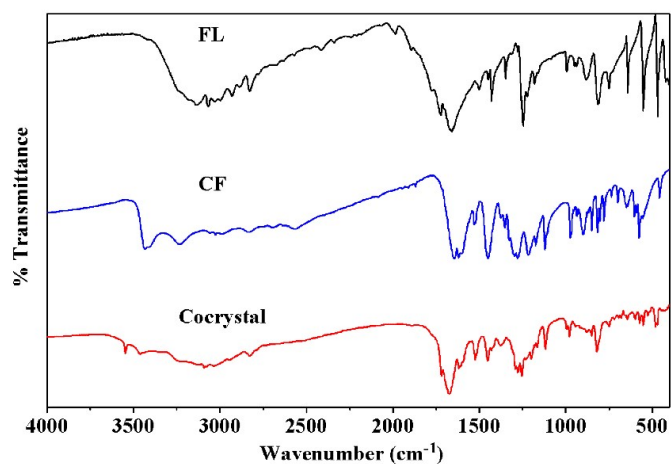

Fig. S1 FT-IR spectra of FL-CF-2H<sub>2</sub>O cocrystal compared with the starting materials.

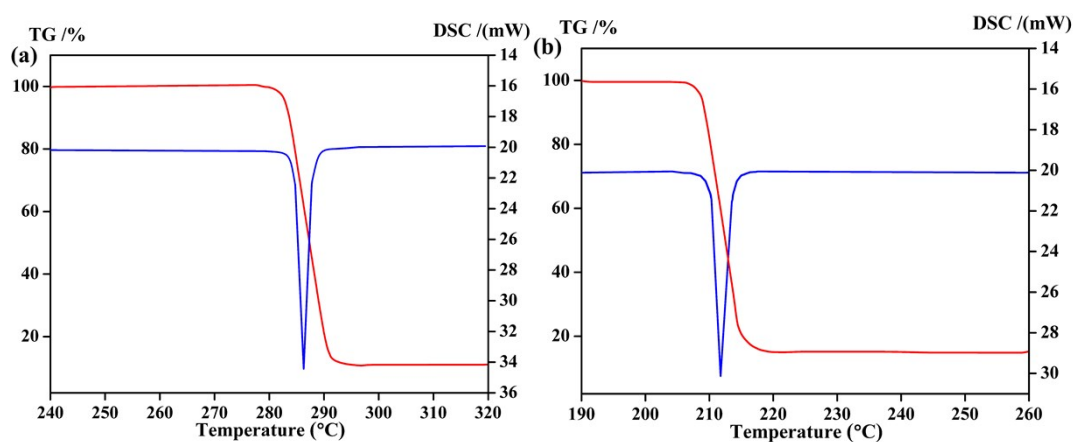

Fig. S2 DSC (blue line) and TGA (red line) profiles of pure FL (a) and CF (b).

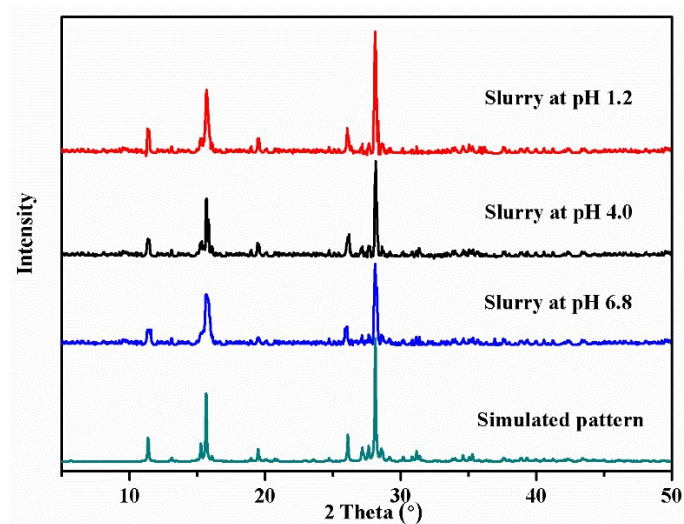

Fig. S3 PXRD comparison of simulated pattern and experimental pattern for remaining solids after the powder dissolution measurements.

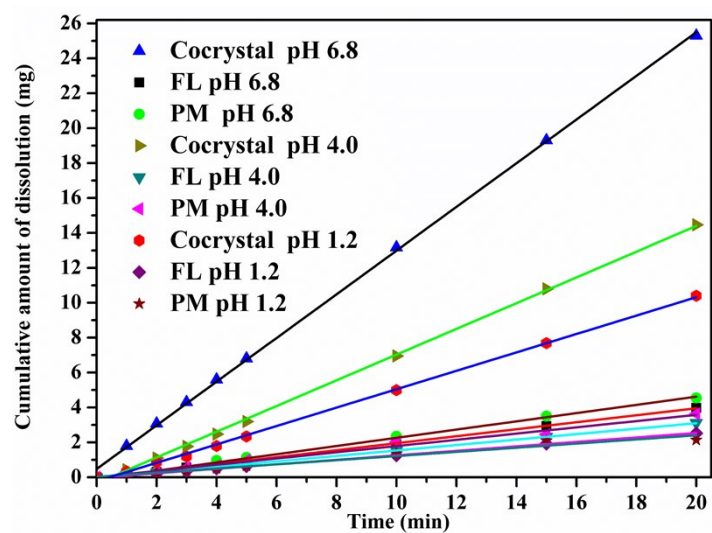

**Fig. S4** IDR profiles of FL and FL-CF-2H<sub>2</sub>O cocrystal at pH 1.2, 4.0, and 6.8 buffers.
